# Supplementary material
Source: PubMed Central journal article supplement (PMC6295274)

**Supplementary Figure 1. Deamination of Cytosine or 5-methylcytosine to Uracil or Thymine respectively.**

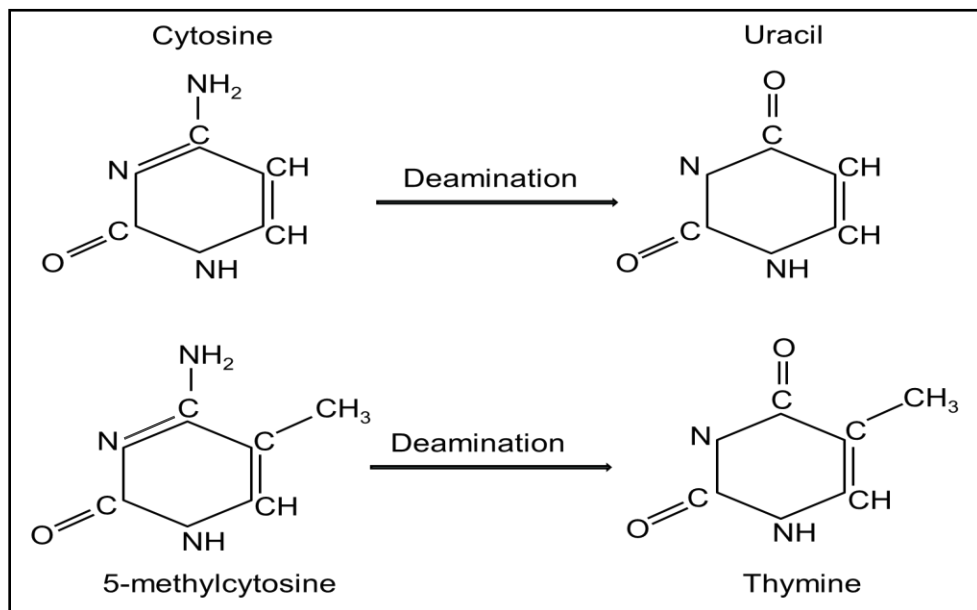

Supplement: NIHMS1509824-supplement-1.pdf [file NIHMS1509824-supplement-1.pdf]
