# Supplementary material
Source: PubMed Central journal article supplement (PMC6295274)

## Supplementary Figure 2. Sensitivity of T790M ddPCR assay.

In this assay, 10 ng of H1975 DNA was serially diluted by factor of 10 in 50,000 copies of T790M negative genomic DNA. The mean lowest copy number detected at 0.01ng was 3, and thus the limit of detection was 0.012%.

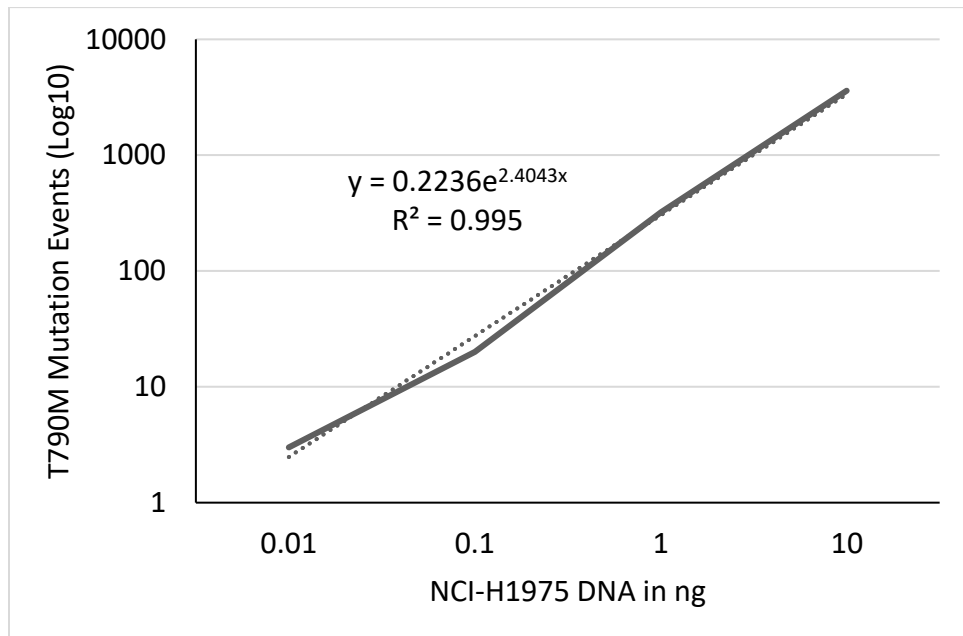

Supplement: NIHMS1509824-supplement-2.pdf [file NIHMS1509824-supplement-2.pdf]
