# Supplementary material
Source: PubMed Central journal article supplement (PMC6295274)

**Supplementary Figure 3. A)** APOBEC family mRNA expression after exposure to gefitinib. AICDA increase in expression after gefitinib treatment is more conspicuous than the other APOBECs. AICDA expression in EGFR mutated lung adenocarcinoma cell lines **B)** HCC827 and **C)** H1650 after TKI exposure.

**A)**

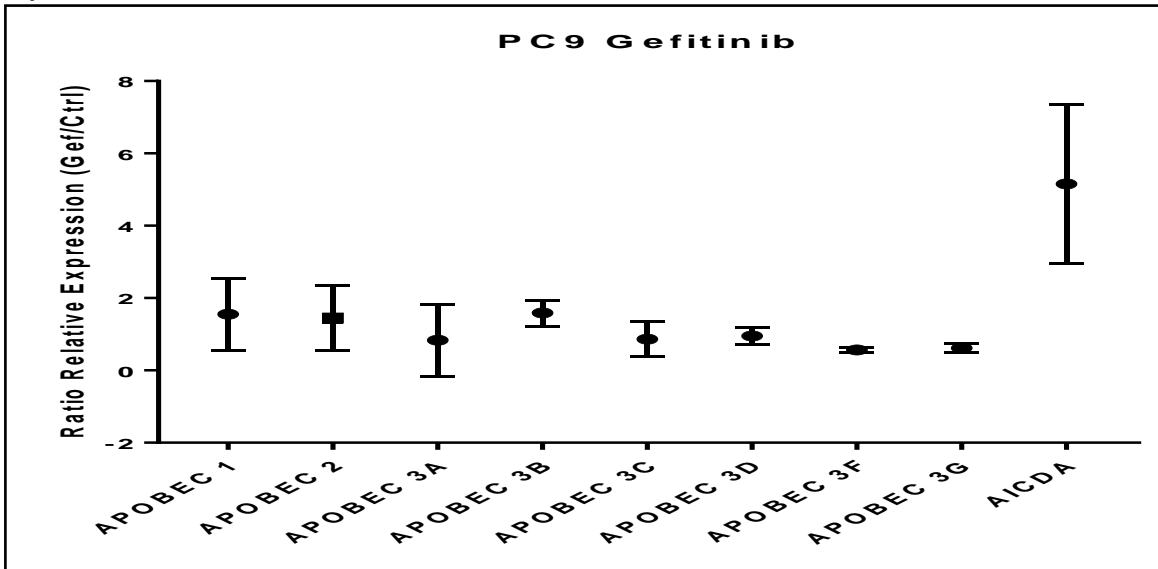

**B)**

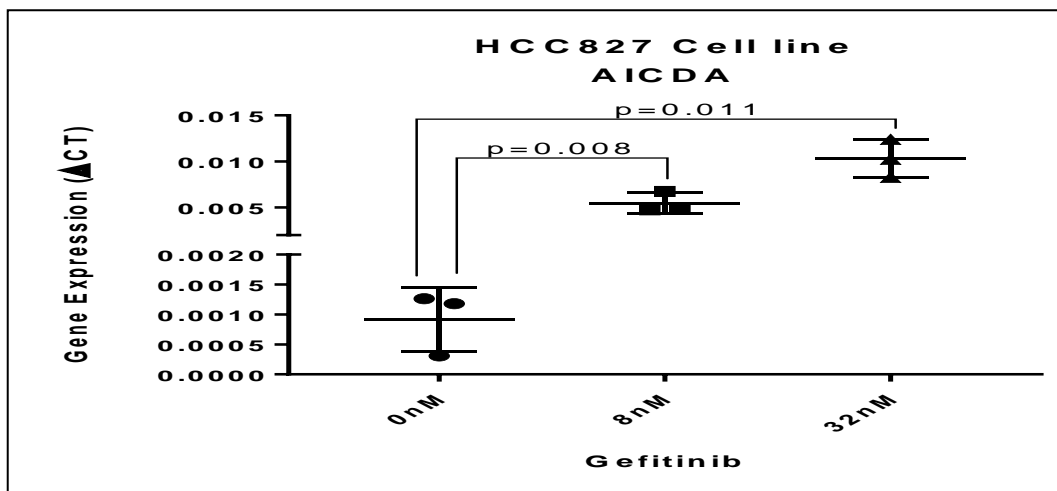

**C)**

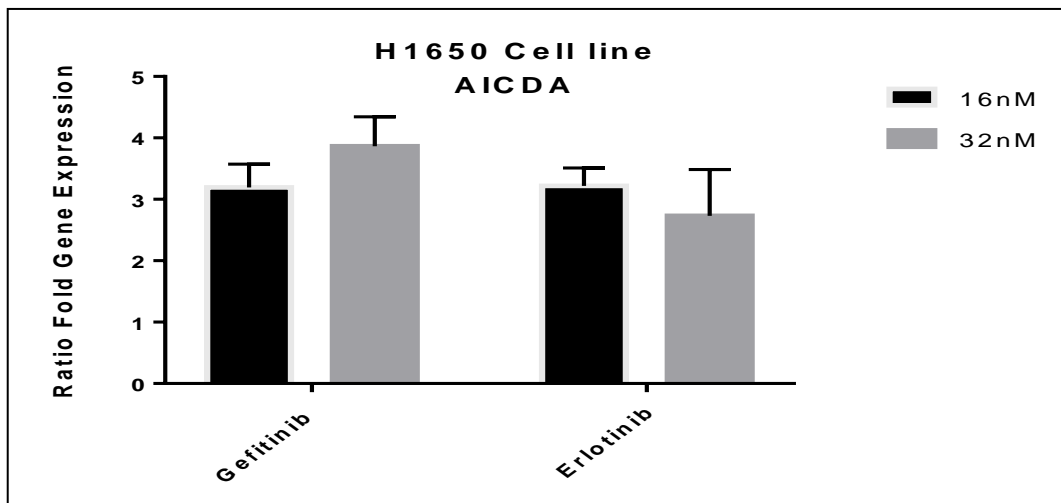

Supplement: NIHMS1509824-supplement-3.pdf [file NIHMS1509824-supplement-3.pdf]
