# Supplementary material
Source: PubMed Central journal article supplement (PMC6295274)

**Supplementary Figure 4. PC9 cells treated with gefitinib (GEF) or gefitinib/ BAY11-7802.** AICDA and RELB expression increased after TKI exposure was inhibited upon pretreatment with BAY11-7802.

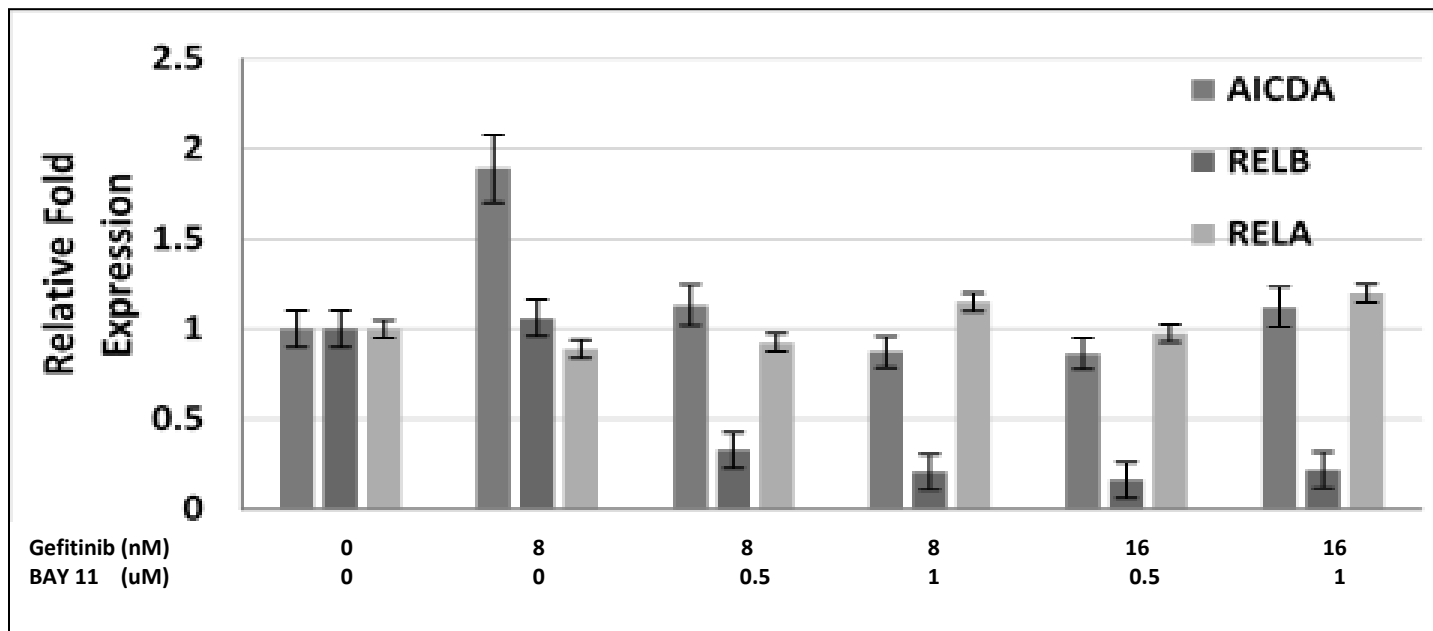

Supplement: NIHMS1509824-supplement-4.pdf [file NIHMS1509824-supplement-4.pdf]
