# Supplementary material
Source: PubMed Central journal article supplement (PMC6295274)

## Supplementary Figure 6.

AICDA CRISPR1. Single point deletion occurring at Exon 2 leading to a shift in the reading frame at amino acid 21 and introducing an early Stop codon: MDSLLMNRKFLYQFKNVRW LRVGVRPTCAT STOP

A)

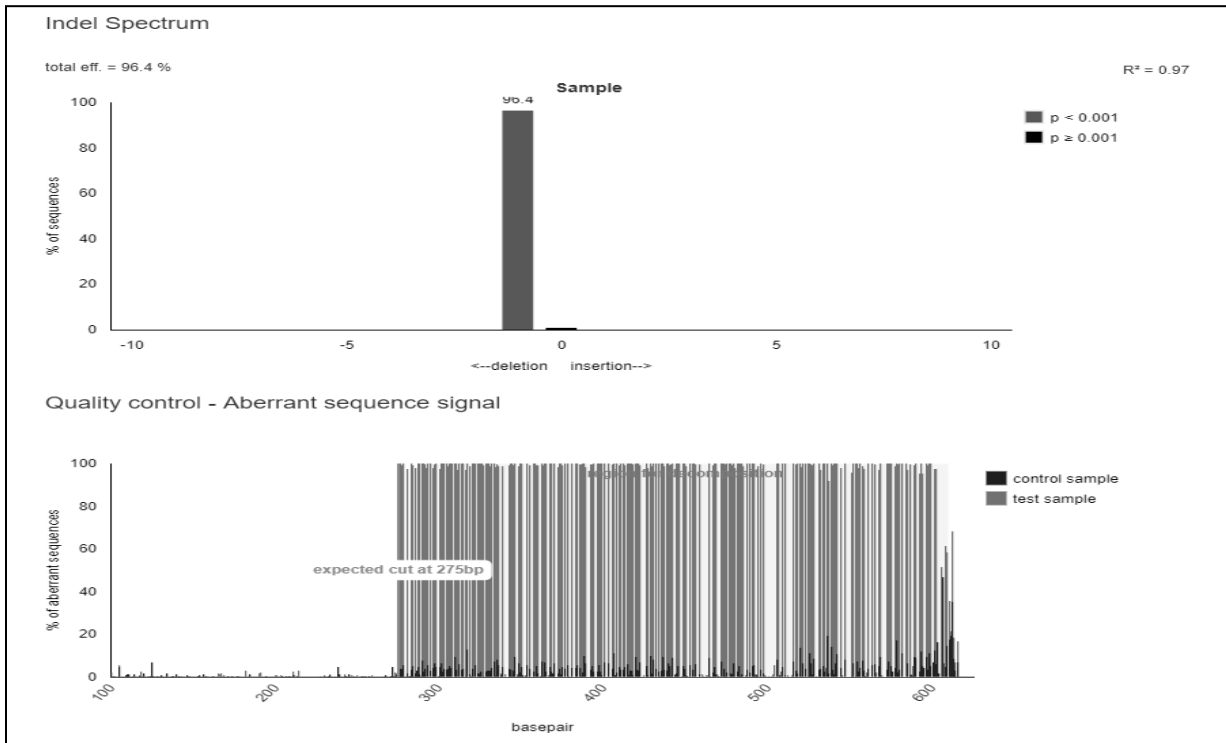

B)

AICDA CRISPR2. Multiple point deletion mutations causing a shift in the reading frame.

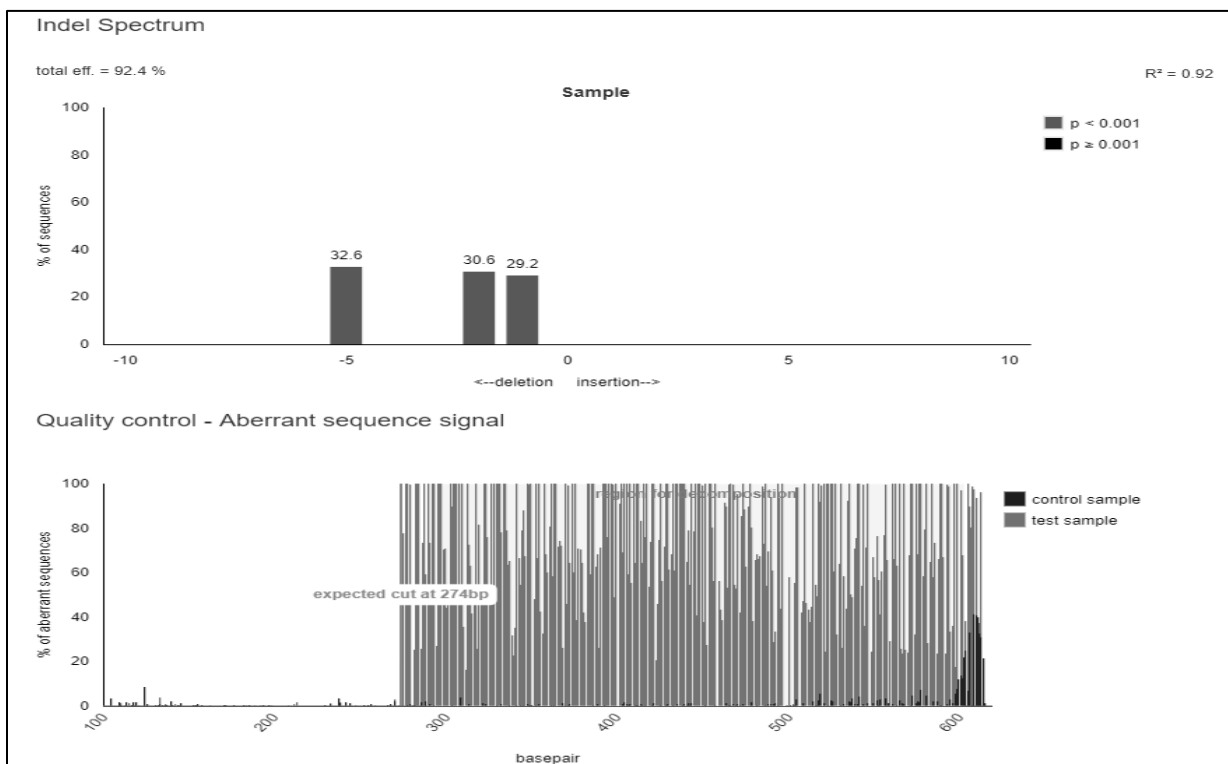

Supplement: NIHMS1509824-supplement-6.pdf [file NIHMS1509824-supplement-6.pdf]
