# Supplementary material
Source: PubMed Central journal article supplement (PMC6295274)
Supplement: NIHMS1509824-supplement-7.pdf [file NIHMS1509824-supplement-7.pdf]

**Supplementary Table 1. Patients' clinical data.**

|            | Age | Gender | Race | Smoking status                          | Stage | Differentiation     | Survival Status | N stage | T stage | M stage | EGFR mutation   | Treatment                                                           |
|------------|-----|--------|------|-----------------------------------------|-------|---------------------|-----------------|---------|---------|---------|-----------------|---------------------------------------------------------------------|
| Patient 1  | 69  | F      | W    | Former smoker<br>10pkyear<br>quit 1970  | IV    | Well-differentiated | Deceased        | N2      | T4      | M1a     | L858R           | Erlotinib<br>Initiated<br>06/13<br>Osimertinib<br>4/16 for<br>T790M |
| Patient 2  | 76  | F      | W    | Never smoker                            | IV    | NA                  | Alive           | N3      | T3      | M1a     | L858R           | Erlotinib<br>12/14<br>Osimertinib<br>06/16<br>T790M                 |
| Patient 3  | 59  | F      | AA   | Former smoker<br>13pkyear<br>quit 1985  | IV    | NA                  | Deceased        | N3      | T3      | M1a     | Del19           | Erlotinib<br>05/14<br>Progressed<br>04/15                           |
| Patient 4  | 75  | F      | W    | Never smoker                            | IV    | NA                  | Deceased        | N2      | T2      | M1b     | Del19           | 09/17<br>Untreated                                                  |
| Patient 5  | 76  | M      | W    | Former smoker<br>165pkyear<br>quit 2012 | IV    | NA                  | Alive           | N2      | T3      | M1b     | Del19           | 08/17<br>Diagnosed<br>03/18<br>Osimertinib                          |
| Patient 6  | 58  | M      | W    | Never smoker                            | IV    | Mod differentiated  | Alive           | N2      | T2      | M1b     | Insertion<br>20 | 09/17<br>Diagnosed                                                  |
| Patient 7  | 54  | F      | W    | Former smoker<br>3pkyear<br>quit 1998   | IV    | Poor differentiated | Alive           | N2      | T2      | M1a     | L858R           | 02/14<br>Erlotinib<br>04/14<br>Afatinib<br>6/16<br>Tagrisso         |
| Patient 8  | 72  | M      | W    | Never smoker                            | IV    | NA                  | Deceased        | Nx      | T2      | M1b     | L858R           | 03/14<br>Erlotinib<br>09/15<br>Afatinib<br>12/15<br>Osimertinib     |
| Patient 9  | 60  | F      | W    | Former smoker<br>1.3pkyear<br>quit 2000 | IV    | Mod differentiated  | Alive           | N2      | T2      | M1a     | Del19           | 10/13<br>Erlotinib<br>11/15<br>Osimertinib                          |
| Patient 10 |     | F      | W    | Never smoker                            | IV    | NA                  | Alive           | N2      | T2      | M1a     | Del19           | 11/13<br>Afatinib<br>01/16<br>Osimertinib                           |
