# Supplementary material
Source: PubMed Central journal article supplement (PMC6295274)
Supplement: NIHMS1509824-supplement-8.pdf [file NIHMS1509824-supplement-8.pdf]

**Supplementary Table 2. A) Cytosine Methylation Status by Mass Spectrometry.** Cytosine at CpG positions, **2369** and **2383** have high methylation ratio in PC9, H1299 and H460. Cytosine at CpG positions **2331** and **2353** are not. H1975 has C>T mutation at position **2369**, thus no methylation was detected. **B) PC9 mutation frequency by WES after gefitinib treatment;** showing number of new variants detected including SNPs and specifically cytosine based SNPs

**A)**

|                     |                        | Cell Line |      |       |       |      |
|---------------------|------------------------|-----------|------|-------|-------|------|
|                     |                        | PC9       | PC9  | H1299 | H1975 | H460 |
| <b>CpG Position</b> | <b>EGFR-m_CpG_2331</b> | Neg       | Neg  | Neg   | Neg   | Neg  |
|                     | <b>EGFR-m_CpG_2353</b> | Neg       | Neg  | Neg   | Neg   | Neg  |
|                     | <b>EGFR-m_CpG_2369</b> | 0.99      | 0.89 | 0.85  | Neg   | 0.87 |
|                     | <b>EGFR-m_CpG_2383</b> | 1         | 1    | 1     | 0.97  | 1    |

**B)**

|                         | <b>Variants</b> | <b>SNP</b> | <b>C_SNP</b> |
|-------------------------|-----------------|------------|--------------|
| <b>PC9 ctrl vs. Gef</b> | 137             | 72         | 46           |
| <b>PC9 ctrl vs. Gef</b> | 153             | 98         | 60           |
